# Supplementary material for: Improving virus production through quasispecies genomic selection and molecular breeding
Source: PubMed Central journal article supplement (PMC5093897; doi:10.1038/srep35962), 2016-11-03
Supplement: srep35962-s1.pdf [file srep35962-s1.pdf]

# SUPPLEMENTARY INFORMATION

## Improving virus production through quasispecies genomic selection and molecular breeding

Francisco J. Pérez-Rodríguez<sup>1,2</sup>, Lucía D'Andrea<sup>1,2</sup>, Montserrat de Castellarnau<sup>1,2</sup>, Maria Isabel Costafreda<sup>1,2,7</sup>, Susana Guix<sup>1,2</sup>, Enric Ribes<sup>3</sup>, Josep Quer<sup>4,5</sup>, Josep Gregori<sup>4,5,6</sup>, Albert Bosch<sup>1,2</sup> and Rosa M. Pintó<sup>1,2</sup>

<sup>1</sup>Enteric Virus Laboratory, Department of Genetics, Microbiology and Statistics, School of Biology, University of Barcelona, Barcelona, Spain

<sup>2</sup>Enteric Virus Laboratory, Institute of Nutrition and Food Safety, Campus Torribera, University of Barcelona, Santa Coloma de Gramenet, Spain

<sup>3</sup>Enteric Virus Laboratory, Department of Cell Biology, Physiology and Immunology, School of Biology, University of Barcelona, Barcelona, Spain

<sup>4</sup>Liver Unit. Internal Medicine. Lab. Malalties Hepàtiques. Vall d'Hebron Institut Recerca-Hospital Universitari Vall d'Hebron (VHIR-HUVH), Barcelona, Spain.

<sup>5</sup>Centro de Investigación Biomédica en Red (CIBER) de Enfermedades Hepáticas y Digestivas (CIBERehd) del Instituto de Salud Carlos III.

<sup>6</sup>Roche Diagnostics SL, Barcelona, Spain.

<sup>7</sup>Present Address: Food and Drug Administration, Silver Spring MD, USA

F.J.P. and L.D. contributed equally to this work

\*Correspondence should be addressed to R. M. P. ([rpinto@ub.edu](mailto:rpinto@ub.edu))

## Supplementary Results

**Supplementary Table 1. Haplotypes in the IRES region from the different populations.** Different haplotypes and frequencies were detected in each population through deep-sequencing of the region spanning nucleotides 332-762 (positions in the HM175 strain GeneBank Accession number M14707). Each haplotype was defined by nucleotide replacements with respect to the consensus sequence of the ancestor L0 population.

| Haplotype                  | Nucleotide Replacement | Frequency (%)      |                   |                        |
|----------------------------|------------------------|--------------------|-------------------|------------------------|
|                            |                        | F005LA<br>(N=6768) | F02LA<br>(N=7402) | HM175- HP<br>(N=12857) |
| $\phi$ 1<br>(L0, F0.05LA*) | -                      | 39.1               | 12.24             | 0                      |
| $\phi$ 2                   | C609U                  | 19.99              | 3.15              | 0                      |
| $\phi$ 3                   | U359C                  | 10.79              | 0                 | 0                      |
| $\phi$ 4<br>(F0.2LA)       | A513G                  | 6.96               | 80.05             | 0                      |
| $\phi$ 5                   | U590C                  | 4.52               | 0                 | 0                      |
| $\phi$ 6                   | U359C<br>C609U         | 4.15               | 0                 | 0                      |
| $\phi$ 7                   | U726C                  | 3.47               | 0                 | 0                      |
| $\phi$ 8                   | U561C                  | 1.55               | 0                 | 0                      |
| $\phi$ 9                   | G646A                  | 1.14               | 0                 | 0                      |
| $\phi$ 10                  | U590C<br>U726C         | 1.58               | 0                 | 4.58                   |
| $\phi$ 11                  | C609U<br>U726C         | 1.57               | 0                 | 0                      |
| $\phi$ 12                  | A513G<br>C609U         | 1.37               | 4.57              | 0                      |
| $\phi$ 13                  | U359C<br>U590C         | 1.20               | 0                 | 1.78                   |

|            |                                  |      |   |       |
|------------|----------------------------------|------|---|-------|
| <b>φ14</b> | U359C<br>A513G                   | 1.14 | 0 | 0     |
| <b>φ15</b> | U359C<br>U726C                   | 0.75 | 0 | 2.72  |
| <b>φ16</b> | U359C<br>U590C<br>U726C          | 0.72 | 0 | 88.68 |
| <b>φ17</b> | U359C<br>C609U<br>U726C          | 0    | 0 | 0.94  |
| <b>φ18</b> | U359C<br>A513G<br>U590C<br>U726C | 0    | 0 | 0.79  |
| <b>φ19</b> | U359C<br>U590C<br>C609U<br>U726C | 0    | 0 | 0.51  |

\*In brackets the haplotype sequence corresponding to the consensus sequence

\*\*ND: Not detected

**Supplementary Table 2. Haplotypes in the VP1 region from the different populations.** Different haplotypes and frequencies were detected in each population through deep-sequencing of the region spanning nucleotides 2394-2852 (positions in the HM175 strain GeneBank Accession number M14707). Each haplotype was defined by nucleotide replacements with respect to the consensus sequence of the ancestor L0 population.

| Haplotype          | Codon replacement and frequency of use following the cell codon usage                                            | VP1 position (aa)        | Frequency (%)    |                 |             | RCDI* |
|--------------------|------------------------------------------------------------------------------------------------------------------|--------------------------|------------------|-----------------|-------------|-------|
|                    |                                                                                                                  |                          | F0.05LA (N=3120) | F0.2LA (N=2860) | HP (N=3212) |       |
| <b>λ1 (L0)**</b>   | -                                                                                                                | -                        | 0.99             | 0               | 0           | 1.716 |
| <b>λ2 (F005LA)</b> | ATC (I) (100 %) →<br>GTC (V) (53 %)<br>ATT (I) (61 %) →<br>GTT (V) (34 %)                                        | 85<br><br>146            | 21.67            | 24.27           | 0           | 1.704 |
| <b>λ3</b>          | ATT (I) (61 %) →<br>GTT (V) (34 %)                                                                               | 146                      | 12.02            | 0               | 2.58        | 1.698 |
| <b>λ4 (F02LA)</b>  | ATC (I) (100 %) →<br>GTC (V) (53 %)<br>TTG (L) (26 %) →<br>TTC (F) (100 %)<br>ATT (I) (61 %) →<br>GTT (V) (34 %) | 85<br><br>123<br><br>146 | 36.25            | 63.57           | 1.74        | 1.674 |
| <b>λ5</b>          | TTG (L) (26 %) →<br>TTC (F) (100 %)<br>ATT (I) (61 %) →<br>GTT (V) (34 %)                                        | 123<br><br>146           | 25.87            | 0               | 88.67       | 1.668 |

|            |                                                                                                                                                          |                                     |      |      |      |       |
|------------|----------------------------------------------------------------------------------------------------------------------------------------------------------|-------------------------------------|------|------|------|-------|
| <b>λ6</b>  | ATC (I) (100 %) →<br>GTC (V) (53 %)<br>ATT (I) (61 %) →<br>GTT (V) (34 %)<br>GTA (V) (19 %) →<br>GTT (V) (34 %)                                          | 85<br><br>146<br><br>162            | 0    | 3.99 | 0    | 1.689 |
| <b>λ7</b>  | ATC (I) (100 %) →<br>GTC (V) (53 %)<br>ACC (T) (100 %) →<br>ACT (T) (55 %)<br>ATT (I) (61 %) →<br>GTT (V) (34 %)                                         | 85<br><br>116<br><br>146            | 0    | 0.91 | 0    | 1.721 |
| <b>λ8</b>  | ATC (I) (100 %) →<br>GTC (V) (53 %)<br>TTG (L) (26 %) →<br>TTC (F) (100 %)<br>ATT (I) (61 %) →<br>GTT (V) (34 %)<br>AGC (S) (100 %) →<br>ACC (T) (100 %) | 85<br><br>123<br><br>146<br><br>197 | 0.58 | 0    | 0    | 1.683 |
| <b>λ9</b>  | TTG (L) (26 %) →<br>TTC (F) (100 %)<br>ATT (I) (61 %) →<br>GTT (V) (34 %)<br>AGC (S) (100 %) →<br>ACC (T) (100 %)                                        | 123<br><br>146<br><br>197           | 0.64 | 0    | 1.74 | 1.676 |
| <b>λ10</b> | ATC (I) (100 %) →<br>GTC (V) (53 %)                                                                                                                      | 85                                  | 0.64 | 0    | 0    | 1.722 |

|            |                                                                                                                                                        |                                     |      |      |      |       |
|------------|--------------------------------------------------------------------------------------------------------------------------------------------------------|-------------------------------------|------|------|------|-------|
| <b>λ11</b> | ATC (I) (100 %) →<br>GTC (V) (53 %)<br>ATT (I) (61 %) →<br>GTT (V) (34 %)<br>AGC (S) (100 %) →<br>ACC (T) (100 %)                                      | 85<br><br>146<br><br>197            | 0.61 | 0    | 0    | 1.713 |
| <b>λ12</b> | CCT (P) (78 %) →<br>CCC (P) (100 %)<br>ATT (I) (61 %) →<br>GTT (V) (34 %)                                                                              | 110<br><br>146                      | 0.74 | 0    | 1.03 | 1.670 |
| <b>λ13</b> | ATC (I) (100 %) →<br>GTC (V) (53 %)<br>TTG (L) (26 %) →<br>TTC (F) (100 %)<br>ATT (I) (61 %) →<br>GTT (V) (34 %)<br>GTA (V) (19 %) →<br>GTT (V) (34 %) | 85<br><br>123<br><br>146<br><br>162 | 0    | 7.27 | 0    | 1.659 |
| <b>λ14</b> | TCC (S) (91%) →<br>TCT (S) (77%)<br>TTG (L) (26 %) →<br>TTC (F) (100 %)<br>ATT (I) (61 %) →<br>GTT (V) (34 %)                                          | 76<br><br>123<br><br>146            | 0    | 0    | 2,96 | 1.693 |
| <b>λ15</b> | CCT (P) (78 %) →<br>CCC (P) (100 %)<br>TTG (L) (26 %) →<br>TTC (F) (100 %)<br>ATT (I) (61 %) →<br>GTT (V) (34 %)                                       | 110<br><br>123<br><br>146           | 0    | 0    | 1.53 | 1.639 |

|            |                   |     |   |   |      |       |
|------------|-------------------|-----|---|---|------|-------|
| <b>λ16</b> | TTG (L) (26 %) →  | 123 | 0 | 0 | 1.49 | 1.664 |
|            | TTC (F) (100 %)   |     |   |   |      |       |
|            | ATT (I) (61 %) →  | 146 |   |   |      |       |
|            | GTT (V) (34 %)    |     |   |   |      |       |
|            | GCC (A) (100 %) → | 157 |   |   |      |       |
|            | GTC (V) (53 %)    |     |   |   |      |       |

\*RCDI: Relative Codon Deoptimization Index calculated using the following server: <http://genomes.urv.es/CAIcal/RCDI/>

\*\*In brackets haplotype sequence corresponding to the consensus sequence

**Supplementary Table 3. Virus production in passages subsequent to the appearance of IRES mutations in the different breeds compared to the F0.05LA and F0.2LA parental populations.** Virus production is expressed as the mean  $\pm$  standard error of the Log<sub>10</sub> TCID<sub>50</sub>/cell of 10 passages. Statistically significant differences ( $p < 0.05$ ; Student's t-test) between breeds are indicated by different letters:  $a \neq b$ ,  $a \neq c$ ,  $b \neq c$ ,  $ab = a$ ,  $ab = b$ ,  $ab \neq c$ .

|                        | Molecular breeds              |                              |                              | Parental types               |                              |
|------------------------|-------------------------------|------------------------------|------------------------------|------------------------------|------------------------------|
|                        | 100:1                         | 1:1                          | 1:100                        | F0.05LA                      | F0.2LA                       |
| <b>Production/cell</b> | 2.18 $\pm$ 0.06 <sup>ab</sup> | 2.22 $\pm$ 0.05 <sup>a</sup> | 2.09 $\pm$ 0.06 <sup>b</sup> | 1.73 $\pm$ 0.07 <sup>c</sup> | 1.64 $\pm$ 0.11 <sup>c</sup> |

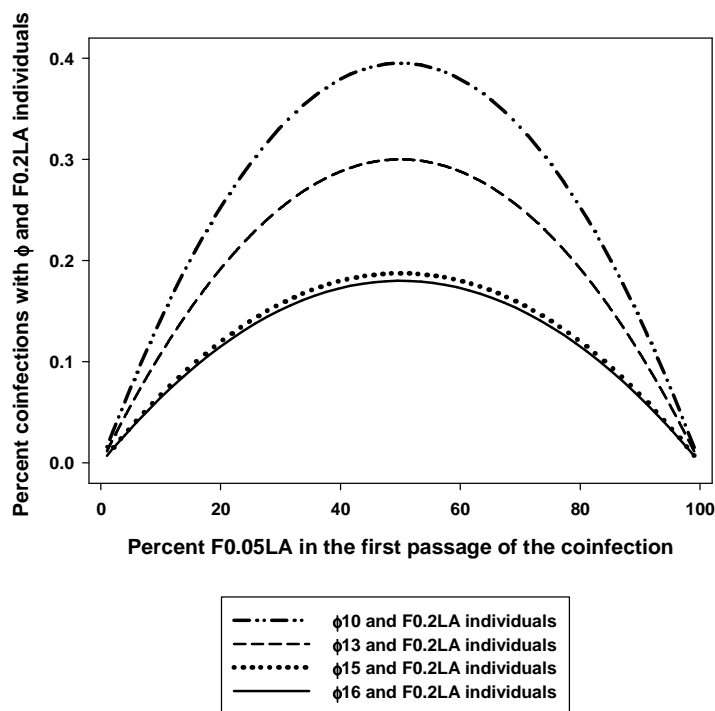

**Figure S2. Likelihood of coinfection of different  $\phi$  haplotypes and F0.2LA individuals in theoretical breeding mixtures.** F0.2LA population was used to rescue low frequency haplotypes from the F0.05LA through molecular breeding events. The likelihood of rescuing these haplotypes is frequency-dependent. On the one hand the optimal ratio of F0.05LA:F0.2LA is 1:1 (50% of each). On the other, the higher the frequency of a haplotype,  $\phi$ 10 (1.58%),  $\phi$ 13 (1.20%),  $\phi$ 15 (0.75%) and  $\phi$ 16 (0.72%), the higher the probability of its rescuing.



**Supplementary Table 4. Diameter of plaques produced by the ancestor and parental type populations and passage 30 (F0.05LA:F0.02LA) breed populations.** Plaque diameter is expressed as the mean  $\pm$  standard error of 20 plaques in FRhK-4 cells in the presence of 0.05  $\mu$ g/ml of AMD with the exception of L0 which were measured in the absence of AMD. Statistically significant differences ( $p < 0.01$ ; Student's t-test) between breeds, ancestor and parental type populations are indicated by different letters:  $a \neq b$ ,  $a \neq c$ ,  $b \neq c$ ,  $b = bc$ ,  $c = b, c$ .

| Populations       | Diameter (cm)                  |
|-------------------|--------------------------------|
| L0                | 0.20 $\pm$ 0.02 <sup>a</sup>   |
| F0.05LA           | 0.61 $\pm$ 0.04 <sup>b</sup>   |
| F0.02LA           | 0.71 $\pm$ 0.04 <sup>b,c</sup> |
| 100:1             | 0.90 $\pm$ 0.10 <sup>b,c</sup> |
| 1:1<br>(HM175-HP) | 1.07 $\pm$ 0.05 <sup>c</sup>   |
| 1:100             | 0.95 $\pm$ 0.16 <sup>c</sup>   |

**Supplementary Table 5. Antigenic recognition of L0 ancestor and HM175-HP populations.** Recognition of  $1 \times 10^6$  TCID<sub>50</sub> by two monoclonal antibodies (mAb) against the immunodominant site (K34C8) and the glycoprotein A binding site (H7C27) and a polyclonal convalescent serum. Values represent the mean  $\pm$  standard error of ELISA absorbance readings of three different experiments. Statistically significant differences ( $P < 0.05$ ; Student's t-test) between both populations are indicated by different letters:  $a \neq b$ .

| Populations | Recognition by antibodies    |                              |                                  |
|-------------|------------------------------|------------------------------|----------------------------------|
|             | mAb<br>K34C8                 | mAb<br>H7C27                 | Polyclonal<br>convalescent serum |
| L0          | 0.15 $\pm$ 0.01 <sup>a</sup> | 0.20 $\pm$ 0.01 <sup>a</sup> | 0.19 $\pm$ 0.01 <sup>a</sup>     |
| HM175-HP    | 0.10 $\pm$ 0.01 <sup>b</sup> | 0.16 $\pm$ 0.01 <sup>b</sup> | 0.17 $\pm$ 0.02 <sup>a</sup>     |

**Supplementary Table 6. Comparative physical stability of L0 ancestor and HM175-HP populations.** Values represent the mean  $\pm$  standard error of  $\text{Log}_{10}(N_t/N_0)$  of three different virus stocks, where  $N_t$  is the titer after the treatment and  $N_0$  the titer of the same viral stock with no treatment. Statistically significant differences ( $p < 0.05$ ; Student's t-test) between both populations are indicated by different letters.

| Populations | Stability          |                    |                             |
|-------------|--------------------|--------------------|-----------------------------|
|             | 5 min<br>61°C      | 60 min<br>pH 2     | 240 min<br>1% biliary salts |
| L0          | $-1.30 \pm 0.15^a$ | $-0.64 \pm 0.05^a$ | $0.12 \pm 0.11^a$           |
| HM175-HP    | $-1.28 \pm 0.08^a$ | $-0.46 \pm 0.04^a$ | $0.04 \pm 0.04^a$           |

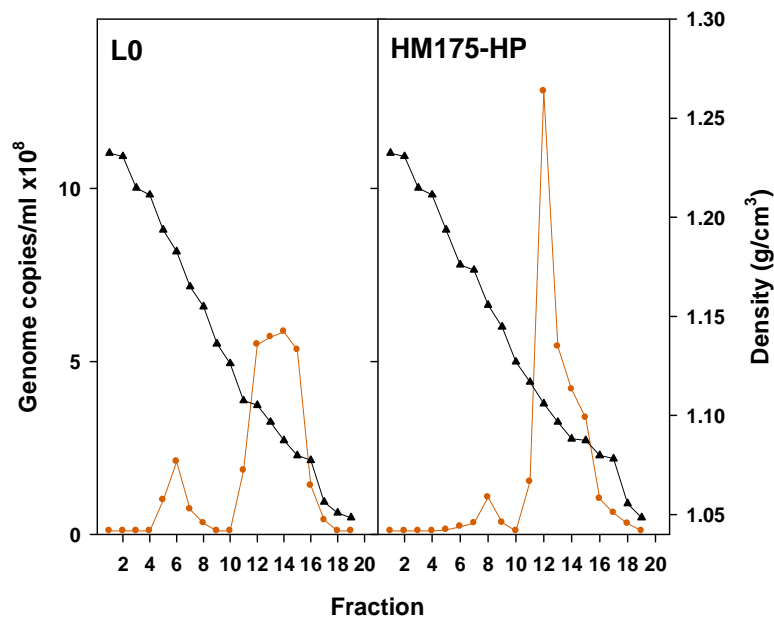

**Figure S3. Sucrose-Iodixanol gradients of HAV particles.** Supernatants from FRhK-4 cells infected with the L0 ancestor population and the HM175-HP fast growing population were analyzed. No significant differences were observed in the production of “pseudoenveloped” particles. (●) is the HAV genome copy numbers/ml in each fraction; (▲) is the density  $\text{g/cm}^3$  of each fraction.

## Supplementary Methods

### Construction of vectors G1RL0 and G1RCMsKp

For the construction of the G1RL0 vector, five mutations were sequentially introduced into the G1RC<sup>1</sup> vector. Two of them (C140T and A194G) were introduced at once, following a method previously described<sup>2</sup>, while the other three (A394G, C473T, C647A) were individually introduced, using the QuikChange Site-Directed Mutagenesis kit (Agilent Technologies). All introduced mutations were confirmed by sequencing using vector-derived external primers. The list of primers is provided in **Supplementary Table 7**.

For the construction of the G1RCMsKp vector, the same site-directed mutagenesis procedure was used to introduce restriction sites for the *MscI* and *KpnI* enzymes between the IRES and the *FLuc* gene. All introduced restriction sites were confirmed by sequencing using vector-derived external primers. Primers used are shown in **Supplementary Table 7**.

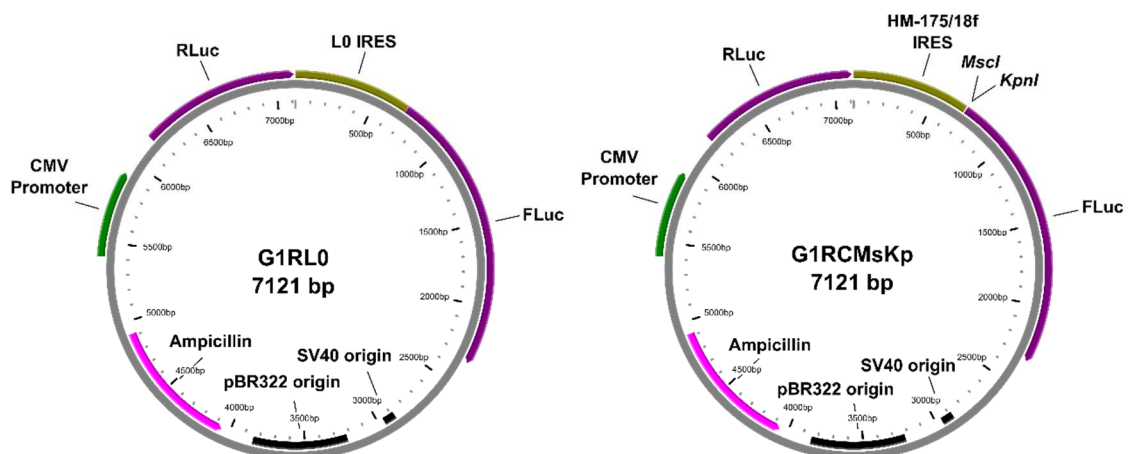

**Figure S1. G1RL0 and G1RCMsKp vectors.**

### **Recognition by H7C27 and K34C8 monoclonal antibodies.**

Virus stocks used in the analysis of recognition by antibodies were treated with 1% NP-40 for 30 min at 37°C. Viruses recovered in the supernatants were subjected to three 30-s sonication cycles of at 60 W.

H7C27 mAb recognizes the glycoprotein A binding site<sup>3, 4</sup> while K34C8 mAb is directed against the immunodominant site<sup>3</sup>. While H7C27 epitope is present in the protomers, procapsids and capsids, the epitope recognized by the K34C8 mAb is present only in procapsids and capsids<sup>5</sup>. For the recognition with each individual mAb an indirect sandwich ELISA was performed<sup>6</sup>, in which particles were captured by a convalescent-phase serum and detected with H7C27 or K34C8 mAbs. All mAbs were used at the highest dilution (1/10000) yielding recognition and were detected using a labeled anti-mouse IgG. An average of  $1.5 \times 10^6$  TCID<sub>50</sub> per well was used.

Recognition of virus stocks by a polyclonal convalescent serum was also tested. A direct sandwich ELISA was performed in which particles were captured and detected with the same convalescent-phase serum. In the detection step the antibodies from the convalescent-phase serum were labeled and used at the highest dilution (1/1400) yielding recognition.

A cut-off level was established corresponding to the mean  $\pm$  3 SD of the unspecific recognition of mock-infected FRhK-4 cell extracts. Three different stocks of each population were tested twice.

### **Physical Stability.**

Treatments at 61°C for 5 min, pH 2 for 1h at 37°C and 1% biliary salts for 4h at 37°C were performed and the resistance of each population evaluated as previously described<sup>7</sup>. To quantify virus decay, a control test of non-treated viruses kept for the same length of time at 37°C was run in parallel. The Log<sub>10</sub> reduction of the virus titer after each treatment ( $N_t$ ) compared with the infectious titer of the parallel non-treated virus control ( $N_0$ ) was figured. Three different stocks for each population were tested and all samples were titrated twice.

### **Sucrose-Iodixanol gradients**

Infected cell culture supernatant fluids were centrifuged at 1,500 x g for 10 minutes at 4°C to pellet any cellular debris and further clarified by centrifuging twice at 10,000 X g for 30 minutes at 4°C. Viruses were further concentrated by ultracentrifugation at 100,000 X g for 1 hour at 4°C. Finally, the resulting pellet was resuspended in 1 ml of phosphate-buffered saline and briefly sonicated, loaded onto a pre-formed 6-50% iodixanol-(OptiPrep, Axis-Shield) sucrose step gradient, and then centrifuged at 205,000 X g for 2 hours and 45 minutes at 4°C using an SW41 Ti rotor in a Beckman Coulter Optima L-90K Ultracentrifuge. Later, approximately 20 fractions of 0.5 ml each were collected from the gradient and the density of each fraction was determined using a refractometer.

RNA from gradient fractions was extracted using the Nucleospin RNA Virus Extraction Kit (Macherey-Nagel) and HAV genome copy numbers were determined by real-time qRT-PCR as previously described<sup>8</sup>. The RNA UltraSense One-Step Quantitative RT-PCR System (Invitrogen) and the

following primers and probe were used in the Mx3000P QPCR System (Stratagene): reverse HAV240 5'GGAGAGCCCTGGAAGAAAG3', forward HAV68 5'TCACCGCCGTTTGCCTAG3' and probe HAV150 6-FAM 5'CCTGAACCTGCAGGAATTAA3'.

### **Statistical analysis.**

Statistical differences between the different virus populations regarding virus production/cell, plaque diameter, monoclonal and polyclonal antibodies recognition and physical stability were assessed using the Student's t-test (two-sided), after verifying the normality of data with the Kolmogorov-Smirnov test.

**Supplementary Table 7. List of primers used for: the modification of the vector G1RC, the introduction of IRES mutations and cloning of VP1 fragments.** In bold nucleotides involved in site-directed mutagenesis. Underlined *Kpn* I restriction site. Mut primers are those used in the confirmation sequencing.

| Primer                                                                           | Sequence                                                                 |
|----------------------------------------------------------------------------------|--------------------------------------------------------------------------|
| <b>G1RC modification into G1RL0</b>                                              |                                                                          |
| C140T<br>A149G+                                                                  | 5'CCCTTTGTTTTGTTTGTAAAT <b>G</b> TTGATTTGTAAATATTGATTCCTGCAGGTTTC3'      |
| C140T<br>A149G-                                                                  | 5'ATCAAC <b>C</b> ATTACAA <b>A</b> CAAACAAGGGGAATAGGAAAGGGAAAAGGGAAAGG3' |
| A394G+                                                                           | 5'CTTTGATCTTCCACAAGGG <b>G</b> TAGGCTACGGGTGAAAC3'                       |
| A394G-                                                                           | 5'GTTTCACCCGTAGCCTA <b>C</b> CCCTTGTGGAAGATCAAAG3'                       |
| C473T+                                                                           | 5'GGGTAACAGCGGCGGATATTGGTGAGTTGTTAAGACAAAAACC3'                          |
| C473T-                                                                           | 5'GGTTTTTGTCTTAACA <b>A</b> CT <b>C</b> ACCAATATCCGCCGCTGTTACCC3'        |
| C647A+                                                                           | 5'GGGGATCCCTCCATTG <b>A</b> CAGCTGGACTGTTTC3'                            |
| C647A-                                                                           | 5'GAACAGTCCAGCTGTCAATGGAGGGATCCCC3'                                      |
| Mut G1RL0+                                                                       | 5'ATACCTCACCGCCGTTTGC3'                                                  |
| Mut G1RL0-                                                                       | 5' CCTTATGCAGTTGCTGTCC3'                                                 |
| <b>G1RC modification into G1RCMsKp</b>                                           |                                                                          |
| MscI+                                                                            | 5'CCTCATTCTTAAATAATAAT <b>G</b> GCCATGGCTGAAGACGCCAAAAAC3'               |
| MscI-                                                                            | 5'GTTTTTGGCGTCTT <b>C</b> AGCCAT <b>G</b> GCATTATTATTTAAGAATGAGG3'       |
| KpnI+                                                                            | 5'TAATAATGGCC <b>A</b> GG <b>T</b> ACCATGGCTGAAGACGCCAAAAACATAAAG3'      |
| KpnI-                                                                            | 5'GCCAT <b>G</b> G <b>T</b> ACCCTGGCCATTATTATTTAAGAATGAGGAAAAACCTAAATG3' |
| Mut MsKp +                                                                       | 5'TCTGCCAAAGACAGGATGTG3'                                                 |
| Mut MsKp -                                                                       | 5'CCTTATGCAGTTGCTCTCC3'                                                  |
| <b>Incorporation of IRES mutations found in the haplotypes into G1RL0 vector</b> |                                                                          |
| A513G+                                                                           | 5'CGGAGGACT <b>G</b> GCTCTCATCCAGTGGATGCATTG3'                           |
| A513G-                                                                           | 5'CAATGCATCCACTGGATGAGAG <b>C</b> CAGTCCTCCG3'                           |
| T590C+                                                                           | 5'CCTCTCTGTGCT <b>C</b> GGGGCAAACATCATTGG3'                              |
| T590C-                                                                           | 5'CAAATGATGTTTGCCCC <b>G</b> AGCACAGAGAGG3'                              |
| T726C+                                                                           | 5'GGTTTTTCCTCATTCT <b>C</b> AAATAATAATGACCATGGCTGAAGACGC3'               |
| T726C-                                                                           | 5'GCGTCTTCAGCCATGGTCATTATTATTT <b>G</b> AGAATGAGGAAAAACC3'               |
| T359C+                                                                           | 5'CACCTTGCAGTGTTAACT <b>C</b> GGCTTTCATGAATCTCTTTG3'                     |
| T359C-                                                                           | 5'CAAAGAGATTCATGAAAGCC <b>G</b> AGTTAACACTGCAAGGTG3'                     |
| Mut IRES+                                                                        | 5'TTCTGTCTTCTTTCTTCCAGG3'                                                |
| Mut G1RL0-                                                                       | 5' CCTTATGCAGTTGCTGTCC3'                                                 |

### Amplification of the VP1 fragment

|                                                                                     |                                                |
|-------------------------------------------------------------------------------------|------------------------------------------------|
| VP1 <i>Kpn</i> I-                                                                   | 5'CCCGGTACCTGATTGTTCTGTGACAGACAAATAACAACCT3'   |
| VP1CC 5'P+                                                                          | 5'CCTTTCCTGAATTGAAACCTGGAGAATCC3'              |
| <b>Incorporation of (U359C, U590C, U726C) IRES mutations in VP1-bearing vectors</b> |                                                |
| T359C+                                                                              | 5'CACCTTGCAGTGTTAACTCGGCTTTCATGAATCTCTTTG3'    |
| T359C-                                                                              | 5'CAAAGAGATTCATGAAAGCCGAGTTAACTGCAAGGTG3'      |
| T590C+alt                                                                           | 5'CCTCTCTGTGCTCGGGGCAAACATCATTGGCCTTAAATGG3'   |
| T590C-alt                                                                           | 5'CCCGAGCACAGAGAGGTCTGGAATTAAGCCTAAAGACAGCCC3' |
| T726C+alt                                                                           | 5'TTTTCCTCATTCTCAAATAATAATGGCCTTTCCTGAATTG3'   |
| T726C-alt                                                                           | 5'TATTTGAGAATGAGGAAAAACCTAAATGCCCTGAGTACC3'    |
| Mut λ-IRES+                                                                         | 5'TTCTGTCTTCTTTCTTCCAGG3'                      |
| Mut λ-IRES-                                                                         | 5'TTCTCCAGGTTTCAATTCAGG3'                      |



**Supplementary Table 8. List of primers used for the analysis of the molecular breeding experiments complete consensus sequence of the HM175-HP population.**

| <b>Primer Name</b> | <b>Primer Sequence</b>        | <b>Position<sup>1</sup></b> |
|--------------------|-------------------------------|-----------------------------|
| 5NCR1+             | 5'TGGTGAGGGGACTTGATCC3'       | 48-66                       |
| 5NCR1-             | 5'GGCGTTGAATGGTTTTTGTC3'      | 503-484                     |
| 5NCR2+             | 5'AGGCTACGGGTGAAACCTC3'       | 396-414                     |
| 5NCR2-             | 5'TCTGCCAAAGACAGGATGTG3'      | 805-786                     |
| VP0N+              | 5'CAGCTGGACTGTTCTTTGGG3'      | 648-667                     |
| VP0N- <sup>1</sup> | 5'TCACCAGGAACCATAGCACAG3'     | 1198-1178                   |
| VP0C+              | 5'TACAATGAGCAGTTTGCTGT3'      | 1065-1084                   |
| VP0C-              | 5'GCTCTTGCATCTTCATAATTTG3'    | 1543-1522                   |
| VP3N+              | 5'GGGACAGGAACCTCAGCTTATAC3'   | 1380-1402                   |
| VP3N-              | 5'AATCTACCTGAATGATATTTGG3'    | 1861-1840                   |
| VP3i+              | 5'GTTATTCCAGTTGACCCATATT3'    | 1701-1722                   |
| VP3i-              | 5'TGTATACCTGTTCACCTGTGA3'     | 2030-2010                   |
| VP3C+              | 5'TGTGCAGTAATGGATATTACAG3'    | 1938-1959                   |
| VP3C-              | 5'GTTGTTATACCAACTTGGGGA3'     | 2287-2267                   |
| VP1N+              | 5'AATGTTTATCTTTCAGCAAT3'      | 2136-2155                   |
| VP1N-              | 5'TCTGACAGCTCCAAGAGCAGTTTT3'  | 2774-2751                   |
| VP1C+2             | 5'TAGGTCTTGCCGTTGATACT3'      | 2692-2711                   |
| VP1C-2             | 5'CTTGTGAAAACAGTCCCTTC3'      | 3243-3224                   |
| 2A+                | 5'ATCAGAGGAAGATAAAAAGATTT3'   | 3083-3104                   |
| 2A-                | 5'TCTACACTCTGCTATTAATCCA3'    | 3701-3680                   |
| 2B+                | 5'GTCTGAAACGGATTTGTGTT3'      | 3569-3588                   |
| 2B-                | 5'AACCAGTTGGAAAACTCTG3'       | 4012-3993                   |
| 2CN+               | 5'CCAGAATGATGGAGTTAAGG3'      | 3970-3989                   |
| 2CN-               | 5'-TCTGAAGCCACAGGTTTAGT-3'    | 4534-4515                   |
| 2CC+               | 5'GGCAACCAAAATTTGTAAAC3'      | 4463-4482                   |
| 2CC-               | 5'GAGACCACAACCTCCATGAAT3'     | 4998-4979                   |
| 3AB+               | 5'GTTTCATTGATGGATTTGCT3'      | 4911-4930                   |
| 3AB-               | 5'CTTCCTAACCAGTCCTGCTA3'      | 5324-5305                   |
| 3CN+               | 5'ATGGTGTAACCTAAGCCCAAG3'     | 5233-5252                   |
| 3CN-               | 5'ATAGGGGTTCCATTTACA3'        | 5674-5657                   |
| 3CC+               | 5'TGGCAACATTAGTGACAA3'        | 5638-5655                   |
| 3CC-               | 5'TTTGGAGACCACATTCAT3'        | 5999-5982                   |
| 3CD                | 5'ATTGATAAGAAAATTGAAAGTCA3'   | 5925-5947                   |
| 3CD-               | 5'AACATCCAAATCAGAACAAT3'      | 6409-6428                   |
| 3D+                | 5'GAAGTTGACCAAAAAGAGATT3'     | 6302-6321                   |
| 3D-                | 5'ATGATTCTACCTGCTTCTCT3'      | 6739-6720                   |
| 3Db+               | 5'TTTGATGCTAGTCTTAGTCCATTTA3' | 6690-6714                   |
| 3-                 | 5'AAGAAAGTTCATTTAAACAAATCA3'  | 7439-7416                   |

<sup>1</sup> positions in the HM175 strain GeneBank Accession number M14707

## References

1. Mackiewicz, V. et al. Nucleotide Variability and Translation Efficiency of the 5' Untranslated Region of Hepatitis A Virus: Update from Clinical Isolates Associated with Mild and Severe Hepatitis. *J. Virol.* **84**, 10139-10147 (2010).
2. Liu, H. & Naismith, J.H. An efficient one-step site-directed deletion, insertion, single and multiple-site plasmid mutagenesis protocol. *BMC Biotechnol.* **8**, 91 (2008).
3. Ping, L.H. & Lemon, S.M. Antigenic structure of human hepatitis A virus defined by analysis of escape mutants selected against murine monoclonal antibodies. *J. Virol.* **66**, 2208-2216 (1992).
4. Sánchez, G. et al. Capsid region involved in hepatitis a virus binding to glycoprotein A of the erythrocyte membrane. *J. Virol.* **78**, 9807-9813 (2004).
5. Stapleton, J.T. et al. Antigenic and immunogenic properties of recombinant hepatitis A virus 14S and 70S subviral particles. *J. Virol.* **67**, 1080-1085 (1993).
6. Bosch, A. et al. A new continuous epitope of hepatitis A virus. *J. Med. Virol.* **54**, 95-102 (1998).
7. Costafreda, M.I. et al. Hepatitis a virus adaptation to cellular shutoff is driven by dynamic adjustments of codon usage and results in the selection of populations with altered capsids. *J. Virol.* **88**, 5029-5041 (2014).
8. Costafreda, M.I., Bosch, A. & Pintó, R.M. Development, Evaluation, and Standardization of a Real-Time TaqMan Reverse Transcription-PCR Assay for Quantification of Hepatitis A Virus in Clinical and Shellfish Samples. *Appl. Environ. Microbiol.* **72**, 3846-3855 (2006).
